# Supplementary material for: Chromosome-level genome assembly of the fully mycoheterotrophic orchid Gastrodia elata
Source: PubMed Central journal article supplement (PMC8896018; doi:10.1093/g3journal/jkab433), 2022-01-19
Supplement: jkab433_supplemental_tables.pdf [file jkab433_supplemental_tables.pdf]

**Table S1. Genome assemblies used in this study.**

| Common name        | Species                       | Accession Number    | Reference                               |
|--------------------|-------------------------------|---------------------|-----------------------------------------|
| Kiwifruit          | <i>Actinidia chinensis</i>    | GCA_003024255.1     | Pilkington <i>et al.</i> , 2018         |
| Grass orchids      | <i>Apostasia shenzhenica</i>  | GCA_002786265.1     | Zhang <i>et al.</i> , 2017              |
| Thale cress        | <i>Arabidopsis thaliana</i>   | TAIR10              | The Arabidopsis Genome Initiative. 2000 |
| Robusta coffee     | <i>Coffea canephora</i>       | GCA_900059795.1     | Denoeud <i>et al.</i> , 2015            |
| Tea plant          | <i>Camellia sinensis</i>      | GCA_004153795.2     | Wei <i>et al.</i> , 2018                |
| Chained Dendrobium | <i>Dendrobium catenatum</i>   | GCF_001605985.2     | Zhang <i>et al.</i> , 2016              |
| African oil palm   | <i>Elaeis guineensis</i>      | GCF_000442705.1     | Singh <i>et al.</i> , 2013              |
| Tien Ma            | <i>Gastrodia elata</i>        | JACERR000000000     | This Study                              |
| Soybean            | <i>Glycine max</i>            | GCF_000004515.5     | Schmutz <i>et al.</i> , 2010            |
| Rice               | <i>Oryza sativa</i>           | IRGSP-1.0           | Goff <i>et al.</i> , 2002               |
| Horse Phalaenopsis | <i>Phalaenopsis equestris</i> | GCF_001263595.1     | Cai <i>et al.</i> , 2015                |
| Black cottonwood   | <i>Populus trichocarpa</i>    | GCF_000002775.4     | Tuskan <i>et al.</i> , 2006             |
| Rhododendron       | <i>Rhododendron delavayi</i>  | DOI: 10.5524/100331 | Zhang <i>et al.</i> , 2017              |
| Tomato             | <i>Solanum lycopersicum</i>   | GCF_000188115.4     | Hosmani <i>et al.</i> , 2018            |
| Grape              | <i>Vitis vinifera</i>         | GCF_000003745.3     | Jaillon <i>et al.</i> , 2007            |

**Table S2. Sequencing data used *G. elata* genome assembly**

|     | Platform                 | Insert size | # of Bases      | Sequencing coverage (x) |
|-----|--------------------------|-------------|-----------------|-------------------------|
| DNA | PacBio Sequel            | 20 Kb       | 88,406,384,499  | 84.60                   |
|     | Illumina<br>Novaseq 6000 | 350 bp      | 132,112,232,346 | 126.43                  |
|     | Hi-C                     | -           | 27,810,468,186  | 27.57                   |
| RNA | PacBio Sequel            | 1~6 Kb      | 72,377,817,589  | 69.26                   |

**Table S3. Lengths of *G. elata* genome assembly**

| Scaffolds  | Length(bp)    | % of Total Bases |
|------------|---------------|------------------|
| Scx7bQ7_8  | 130,552,502   | 12.49            |
| Scx7bQ7_10 | 105,251,433   | 10.07            |
| Scx7bQ7_4  | 73,478,629    | 7.03             |
| Scx7bQ7_1  | 69,223,480    | 6.62             |
| Scx7bQ7_5  | 62,300,322    | 5.96             |
| Scx7bQ7_14 | 52,263,389    | 5.00             |
| Scx7bQ7_12 | 50,595,616    | 4.84             |
| Scx7bQ7_3  | 50,555,507    | 4.84             |
| Scx7bQ7_17 | 49,986,487    | 4.78             |
| Scx7bQ7_7  | 48,229,918    | 4.62             |
| Scx7bQ7_6  | 45,687,624    | 4.37             |
| Scx7bQ7_19 | 44,908,175    | 4.30             |
| Scx7bQ7_13 | 43,882,508    | 4.20             |
| Scx7bQ7_11 | 40,290,820    | 3.86             |
| Scx7bQ7_2  | 39,714,827    | 3.80             |
| Scx7bQ7_9  | 36,014,257    | 3.45             |
| Scx7bQ7_18 | 33,358,019    | 3.19             |
| Scx7bQ7_16 | 32,099,965    | 3.07             |
| Total      | 1,008,393,478 | 96.50            |

**Table S4. Quality assessment of repetitive elements identified in four orchid species**

| Species               | Intact  | Total  | Raw LAI | LAI  |
|-----------------------|---------|--------|---------|------|
| <i>G. elata</i>       | 0.0082  | 0.6227 | 1.31    | 6.94 |
| <i>A. shenzhenica</i> | 0.0037  | 0.1967 | 1.9     | 7.53 |
| <i>D. catenatum</i>   | 0.0075  | 0.387  | 1.93    | 7.56 |
| <i>P. equestris</i>   | <0.0005 | -      | -       | -    |

LAI: LTR Assembly Index

**Table S5. Search for database search with the *G. elata* annotations**

| Database            | # of mRNAs | % via Total mRNAs |
|---------------------|------------|-------------------|
| Uni-prot/swiss-prot | 18,545     | 98.41             |
| InterProScan        | 14,772     | 78.39             |
| Pfam                | 11,503     | 61.04             |
| GO                  | 15,619     | 82.89             |
| KEGG                | 2,499      | 13.26             |

**Table S6. Statistics of annotations for five species.**

| Species/Features     | Number of genes | Total length of genes (bp) | Average length of genes (bp) | Percentage of total length of genes (%) | Number of CDSs | Total length of CDSs (bp) | Average length of CDSs (bp) | Percentage of total length of CDSs (%) | Density (#/Mb) |
|----------------------|-----------------|----------------------------|------------------------------|-----------------------------------------|----------------|---------------------------|-----------------------------|----------------------------------------|----------------|
| <i>A.shenzhenica</i> | 21,743          | 133,669,749                | 6,148                        | 38.33                                   | 21,743         | 23,901,705                | 1,099                       | 6.85                                   | 62.35          |
| <i>D.catenatum</i>   | 25,251          | 279,077,958                | 11,052                       | 25.27                                   | 34,389         | 47,770,530                | 1,389                       | 4.33                                   | 22.87          |
| <i>E.guineensis</i>  | 29,569          | 249,417,635                | 8,435                        | 16.25                                   | 43,551         | 62,228,253                | 1,429                       | 4.05                                   | 19.26          |
| <i>G.elata</i>       | 18,698          | 133,969,721                | 7,165                        | 12.80                                   | 18,844         | 17,679,423                | 938                         | 1.69                                   | 18.01          |
| <i>P.equestris</i>   | 21,219          | 309,851,873                | 14,603                       | 29.12                                   | 29,894         | 39,623,205                | 1,325                       | 3.72                                   | 19.94          |

**Table S7. Top 50 GO terms of expanded gene families in the *G. elata* genome among fifteen plants.**

| Category | GO ID      | GO Name                                          | No. genes | FDR    |
|----------|------------|--------------------------------------------------|-----------|--------|
| B        | GO:0009987 | cellular process                                 | 1,240     | 2.E-02 |
| B        | GO:0008152 | metabolic process                                | 1,195     | 3.E-06 |
| M        | GO:0003824 | catalytic activity                               | 1,139     | 2.E-04 |
| M        | GO:0005488 | binding                                          | 1,082     | 2.E-10 |
| B        | GO:0071704 | organic substance metabolic process              | 1,026     | 2.E-05 |
| B        | GO:0044237 | cellular metabolic process                       | 990       | 2.E-05 |
| B        | GO:0044238 | primary metabolic process                        | 964       | 5.E-04 |
| B        | GO:0006807 | nitrogen compound metabolic process              | 882       | 2.E-05 |
| B        | GO:0043170 | macromolecule metabolic process                  | 856       | 4.E-08 |
| M        | GO:1901363 | heterocyclic compound binding                    | 744       | 2.E-05 |
| M        | GO:0097159 | organic cyclic compound binding                  | 744       | 3.E-05 |
| B        | GO:0044260 | cellular macromolecule metabolic process         | 667       | 1.E-09 |
| M        | GO:0043167 | ion binding                                      | 617       | 6.E-09 |
| B        | GO:0034641 | cellular nitrogen compound metabolic process     | 582       | 2.E-04 |
| M        | GO:0016740 | transferase activity                             | 541       | 2.E-05 |
| B        | GO:1901360 | organic cyclic compound metabolic process        | 536       | 8.E-05 |
| B        | GO:0006725 | cellular aromatic compound metabolic process     | 531       | 3.E-05 |
| B        | GO:0046483 | heterocycle metabolic process                    | 526       | 4.E-05 |
| B        | GO:0006139 | nucleobase-containing compound metabolic process | 506       | 3.E-05 |
| B        | GO:0090304 | nucleic acid metabolic process                   | 485       | 2.E-07 |
| M        | GO:0003676 | nucleic acid binding                             | 470       | 3.E-06 |
| B        | GO:0009058 | biosynthetic process                             | 434       | 1.E-02 |
| B        | GO:1901576 | organic substance biosynthetic process           | 423       | 2.E-02 |
| B        | GO:0044249 | cellular biosynthetic process                    | 411       | 3.E-02 |
| B        | GO:0019538 | protein metabolic process                        | 410       | 5.E-02 |
| B        | GO:0065007 | biological regulation                            | 394       | 2.E-02 |
| B        | GO:0050789 | regulation of biological process                 | 366       | 2.E-03 |
| M        | GO:0046872 | metal ion binding                                | 363       | 8.E-12 |
| M        | GO:0043169 | cation binding                                   | 363       | 4.E-11 |
| B        | GO:0010467 | gene expression                                  | 360       | 4.E-04 |
| B        | GO:0016070 | RNA metabolic process                            | 357       | 2.E-02 |
| B        | GO:0009059 | macromolecule biosynthetic process               | 334       | 1.E-03 |
| B        | GO:0044271 | cellular nitrogen compound biosynthetic process  | 331       | 6.E-04 |
| B        | GO:0034645 | cellular macromolecule biosynthetic process      | 329       | 1.E-03 |
| B        | GO:0043412 | macromolecule modification                       | 313       | 3.E-02 |

---

|   |            |                                                     |     |        |
|---|------------|-----------------------------------------------------|-----|--------|
| M | GO:0140096 | catalytic activity, acting on a protein             | 308 | 6.E-03 |
| B | GO:1901362 | organic cyclic compound biosynthetic process        | 280 | 2.E-05 |
| B | GO:0018130 | heterocycle biosynthetic process                    | 277 | 2.E-06 |
| B | GO:0019438 | aromatic compound biosynthetic process              | 272 | 1.E-05 |
| B | GO:0019222 | regulation of metabolic process                     | 264 | 1.E-05 |
| B | GO:0034654 | nucleobase-containing compound biosynthetic process | 260 | 7.E-07 |
| B | GO:0060255 | regulation of macromolecule metabolic process       | 257 | 1.E-05 |
| M | GO:0046914 | transition metal ion binding                        | 231 | 8.E-21 |
| B | GO:0031323 | regulation of cellular metabolic process            | 223 | 4.E-03 |
| B | GO:0010468 | regulation of gene expression                       | 221 | 2.E-05 |
| B | GO:0080090 | regulation of primary metabolic process             | 218 | 6.E-03 |
| B | GO:0051171 | regulation of nitrogen compound metabolic process   | 216 | 7.E-03 |
| M | GO:0008270 | zinc ion binding                                    | 199 | 4.E-26 |
| B | GO:0009889 | regulation of biosynthetic process                  | 189 | 2.E-03 |
| B | GO:0031326 | regulation of cellular biosynthetic process         | 188 | 3.E-03 |

---



**Table S8. Top 50 GO terms of contracted gene families in the *G. elata* genome among fifteen plants.**

| Category | GO ID      | GO Name                                         | No. genes | FDR    |
|----------|------------|-------------------------------------------------|-----------|--------|
| C        | GO:0110165 | cellular anatomical entity                      | 1,505     | 7.E-15 |
| B        | GO:0009987 | cellular process                                | 1,270     | 1.E-03 |
| M        | GO:0005488 | binding                                         | 1,098     | 2.E-11 |
| C        | GO:0005622 | intracellular                                   | 877       | 7.E-03 |
| C        | GO:0016020 | membrane                                        | 813       | 5.E-05 |
| C        | GO:0043226 | organelle                                       | 753       | 1.E-03 |
| M        | GO:0097159 | organic cyclic compound binding                 | 741       | 2.E-04 |
| M        | GO:1901363 | heterocyclic compound binding                   | 740       | 2.E-04 |
| C        | GO:0043229 | intracellular organelle                         | 739       | 2.E-03 |
| C        | GO:0043227 | membrane-bounded organelle                      | 674       | 9.E-03 |
| C        | GO:0043231 | intracellular membrane-bounded organelle        | 645       | 3.E-02 |
| B        | GO:0044260 | cellular macromolecule metabolic process        | 642       | 9.E-06 |
| C        | GO:0031224 | intrinsic component of membrane                 | 580       | 2.E-02 |
| C        | GO:0016021 | integral component of membrane                  | 572       | 2.E-02 |
| M        | GO:0043167 | ion binding                                     | 558       | 2.E-02 |
| B        | GO:0065007 | biological regulation                           | 496       | 1.E-16 |
| B        | GO:0050789 | regulation of biological process                | 452       | 5.E-17 |
| B        | GO:0050794 | regulation of cellular process                  | 432       | 2.E-19 |
| C        | GO:0005634 | nucleus                                         | 420       | 5.E-10 |
| B        | GO:0044249 | cellular biosynthetic process                   | 414       | 3.E-02 |
| B        | GO:0044267 | cellular protein metabolic process              | 370       | 9.E-03 |
| B        | GO:0009059 | macromolecule biosynthetic process              | 337       | 9.E-04 |
| B        | GO:0034645 | cellular macromolecule biosynthetic process     | 331       | 9.E-04 |
| B        | GO:0044271 | cellular nitrogen compound biosynthetic process | 328       | 2.E-03 |
| M        | GO:0140096 | catalytic activity, acting on a protein         | 308       | 8.E-03 |
| B        | GO:0006793 | phosphorus metabolic process                    | 298       | 6.E-05 |
| B        | GO:0006796 | phosphate-containing compound metabolic process | 297       | 4.E-05 |
| B        | GO:0019222 | regulation of metabolic process                 | 296       | 1.E-11 |
| B        | GO:0050896 | response to stimulus                            | 294       | 3.E-07 |
| B        | GO:0060255 | regulation of macromolecule metabolic process   | 291       | 4.E-12 |
| B        | GO:0006464 | cellular protein modification process           | 283       | 9.E-05 |
| B        | GO:0036211 | protein modification process                    | 283       | 9.E-05 |
| B        | GO:0031323 | regulation of cellular metabolic process        | 282       | 8.E-14 |
| B        | GO:1901362 | organic cyclic compound biosynthetic process    | 280       | 4.E-05 |
| B        | GO:0051179 | localization                                    | 278       | 5.E-04 |

---

|   |            |                                                                |     |        |
|---|------------|----------------------------------------------------------------|-----|--------|
| B | GO:0080090 | regulation of primary metabolic process                        | 277 | 9.E-14 |
| B | GO:0051171 | regulation of nitrogen compound metabolic process              | 276 | 8.E-14 |
| B | GO:0019438 | aromatic compound biosynthetic process                         | 272 | 2.E-05 |
| M | GO:0003677 | DNA binding                                                    | 270 | 3.E-14 |
| B | GO:0018130 | heterocycle biosynthetic process                               | 265 | 2.E-04 |
| B | GO:0051234 | establishment of localization                                  | 265 | 2.E-03 |
| B | GO:0006810 | transport                                                      | 264 | 8.E-04 |
| B | GO:0034654 | nucleobase-containing compound biosynthetic process            | 258 | 3.E-06 |
| B | GO:0010468 | regulation of gene expression                                  | 248 | 1.E-10 |
| B | GO:0009889 | regulation of biosynthetic process                             | 238 | 3.E-13 |
| B | GO:0019219 | regulation of nucleobase-containing compound metabolic process | 237 | 2.E-13 |
| B | GO:0031326 | regulation of cellular biosynthetic process                    | 237 | 4.E-13 |
| B | GO:0010556 | regulation of macromolecule biosynthetic process               | 236 | 2.E-13 |
| B | GO:0032774 | RNA biosynthetic process                                       | 236 | 2.E-12 |
| B | GO:0051252 | regulation of RNA metabolic process                            | 234 | 9.E-14 |

---

**Table S9. Statistics of gene families of fifteen plants.**

|                                                     | Statistics |
|-----------------------------------------------------|------------|
| Number of species                                   | 15         |
| Number of genes                                     | 439,045    |
| Number of genes in orthogroups                      | 387,848    |
| Number of unassigned genes                          | 51,197     |
| Percentage of genes in orthogroups                  | 88.3       |
| Percentage of unassigned genes                      | 11.7       |
| Number of orthogroups                               | 16,115     |
| Number of species-specific orthogroups              | 418        |
| Number of genes in species-specific orthogroups     | 2,718      |
| Percentage of genes in species-specific orthogroups | 0.6        |
| Mean orthogroup size                                | 24.1       |
| Median orthogroup size                              | 18         |
| G50 (assigned genes)                                | 31         |
| G50 (all genes)                                     | 27         |
| O50 (assigned genes)                                | 3,194      |
| O50 (all genes)                                     | 4,091      |
| Number of orthogroups with all species present      | 6,642      |
| Number of single-copy orthogroups                   | 123        |

**Table S10. The program commands and parameters for genome assembly and repeat annotation of *G. elata*.**

| Process          | Program       | Parameter                                                                                                                                                                                                                                                                                            |
|------------------|---------------|------------------------------------------------------------------------------------------------------------------------------------------------------------------------------------------------------------------------------------------------------------------------------------------------------|
| Kmer Analysis    | jellyfish     | jellyfish count -F 2 -m 17 -C -s 10G -t 32                                                                                                                                                                                                                                                           |
| Assembly         | FALCON-Unzip  | length_cutoff=13000<br>pa_HPCdaligner_option=-v -B128 -M24<br>pa_daligner_option= -k18 -e0.75 -l1200 -h256 -w8 -s100<br>falcon_sense_option=-output-multi --min-idt 0.70 --min-cov 4 --max-n-read 200<br>length_cutoff_pr = 10000<br>overlap_filtering_setting=-max-diff 60 --max-cov 60 --min-cov 2 |
| Hi-C scaffolding | HiRise        | (Not provided from Dovetail Genomics)                                                                                                                                                                                                                                                                |
| Repeat Analysis  | RepeatModeler | BuildDatabase -engine ncbi<br>RepeatModeler -engine ncbi -pa 24                                                                                                                                                                                                                                      |
|                  | LTR_retrever  | gt suffixerator -tis -suf -lcp -des -ssp -sds -dna<br>gt ltrharvest -minlenltr 100 -maxlenltr 7000 -mintsd 4 -maxtsd 6 -motif TGCA -motifmis 1 -similar 85 -vic 10<br>-seed 20 -seqids yes<br>LTR_FINDER_parallel -threads 10 -harvest_out -size 1000000 -time 300<br>LTR_retriever -threads 10      |
|                  | RepeatMasker  | RepeatMasker -lib -pa 32 -no_is -dir                                                                                                                                                                                                                                                                 |
